# Supplementary material for: Alpha-Synuclein mRNA Level Found Dependent on L444P Variant in Carriers and Gaucher Disease Patients on Enzyme Replacement Therapy
Source: MDPI journal article supplement (doi:10.3390/biom13040644), 2023-04-03
Supplement: s1 [file s1]

**Supplementary Table S1. Pearson linear correlation coefficient between the given marker (Lyso- Gb1, *SNCA* mRNA level,  $\alpha$ -SNCA total protein concentration and oligomer concentration) and age in the following groups: GD1, GD3, unknown mutation carriers, L444P carriers, and control.**

|                                  | <b>Lyso-Gb1</b> | <b><math>\alpha</math>-SNCA total protein concentration</b> | <b><i>SNCA</i> mRNA level</b> | <b>Oligomer concentration</b> |
|----------------------------------|-----------------|-------------------------------------------------------------|-------------------------------|-------------------------------|
| <b>GD1</b>                       | 0,098275        | 0,289212                                                    | 0,227364                      | -0,03859                      |
| <b>GD3</b>                       | -0,15565        | -0,51458                                                    | 0,068943                      | -0,05628                      |
| <b>Unknown mutation carriers</b> | -0,05349        | 0,034903                                                    | -0,60128                      | -0,38611                      |
| <b>L444P carriers</b>            | -0,14434        | -0,4052                                                     | 0,741275                      | -0,33516                      |
| <b>Control</b>                   | 0,223636        | -0,1354                                                     | 0,102784                      | -0,09648                      |

**$\alpha$ -SNCA** – alpha-synuclein

**GD** – Gaucher disease

**Lyso-Gb1** - Glucosylsphingosine

***SNCA*** - gene coding alpha-synuclein
