# Supplementary material for: Alpha-Synuclein mRNA Level Found Dependent on L444P Variant in Carriers and Gaucher Disease Patients on Enzyme Replacement Therapy
Source: MDPI journal article supplement (doi:10.3390/biom13040644), 2023-04-03

**Supplementary Figure S1.** Scatter plot of age (x-axis) and biomarkers (Lyso-Gb1,  $\alpha$ -SNCA mRNA level,  $\alpha$ -SNCA total protein concentration and oligomer concentration). Different point types indicate different subgroups.

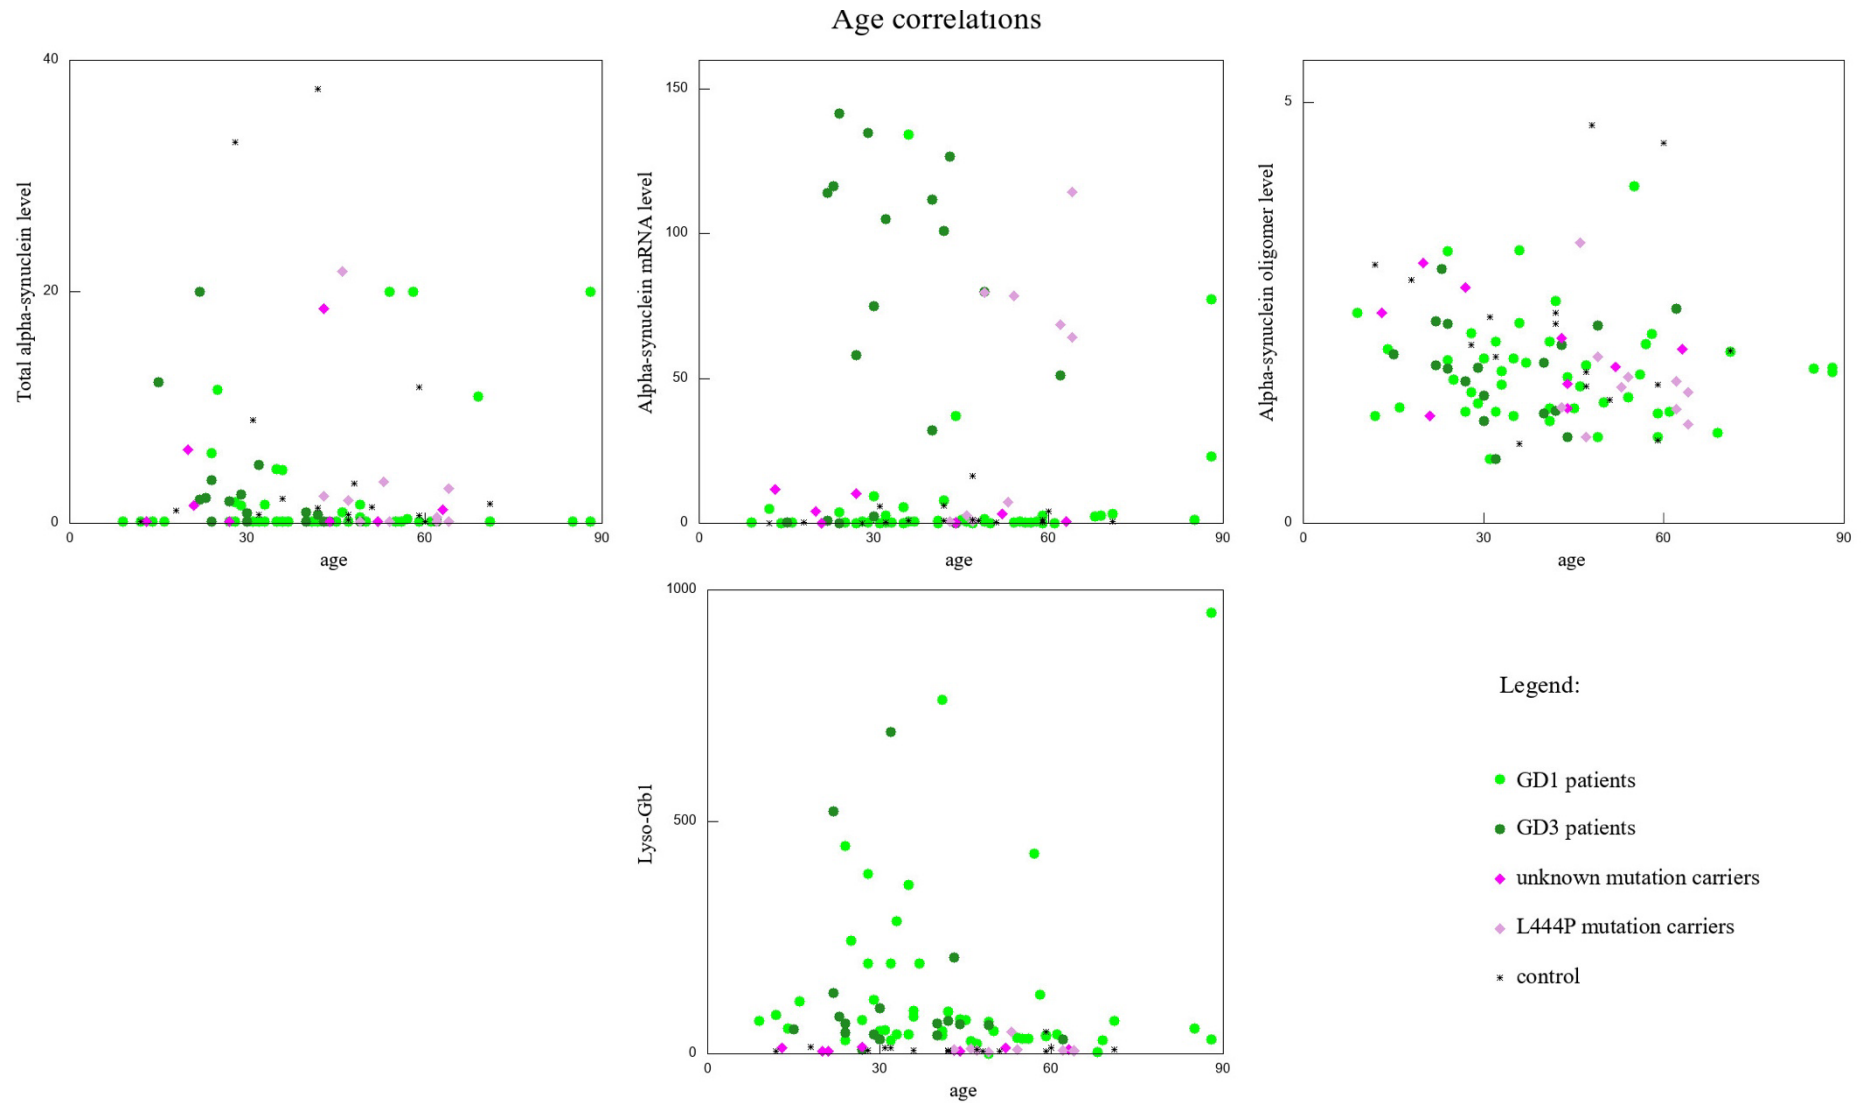

Supplement: s1 [file s1]
